# Supplementary material for: Advantages of immobilization of Pt nanoparticles protected by dendrimers on multiwalled carbon nanotubes
Source: Royal Society of Chemistry journal article supplement (doi:10.1039/c2cp41364g), 2012-01-01
Supplement: c2cp41364g.pdf [file c2cp41364g.pdf]

## Supporting Information

Advantages of Immobilization of Pt Nanoparticles Protected by Dendrimers on Multiwalled Carbon Nanotubes

Ampornphan Siriviriyannun<sup>a</sup> and Toyoko Imae<sup>a,b\*</sup>

<sup>a</sup>Graduate Institute of Applied Science and Technology, and <sup>b</sup>Department of Chemical Engineering, National Taiwan University of Science and Technology, 43 Keelung Road, Section 4, Taipei 10607, Taiwan ROC.

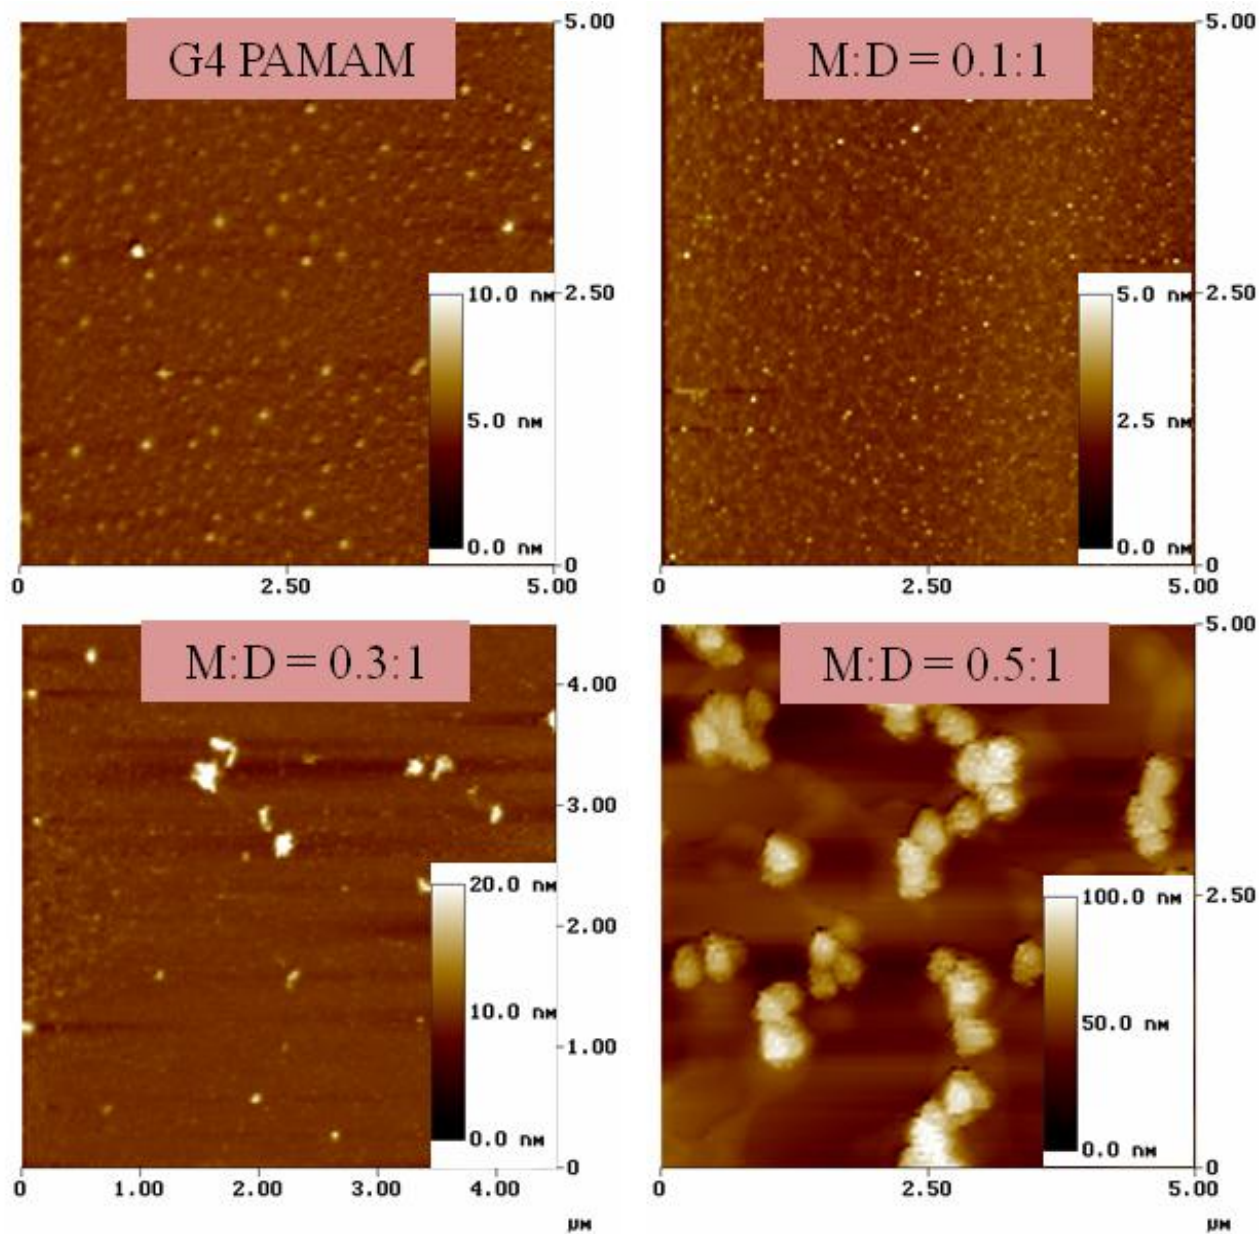

Figure SI-1. AFM images of PAMAM dendrimer and DEN(PtNP)s at different M:D ratios.

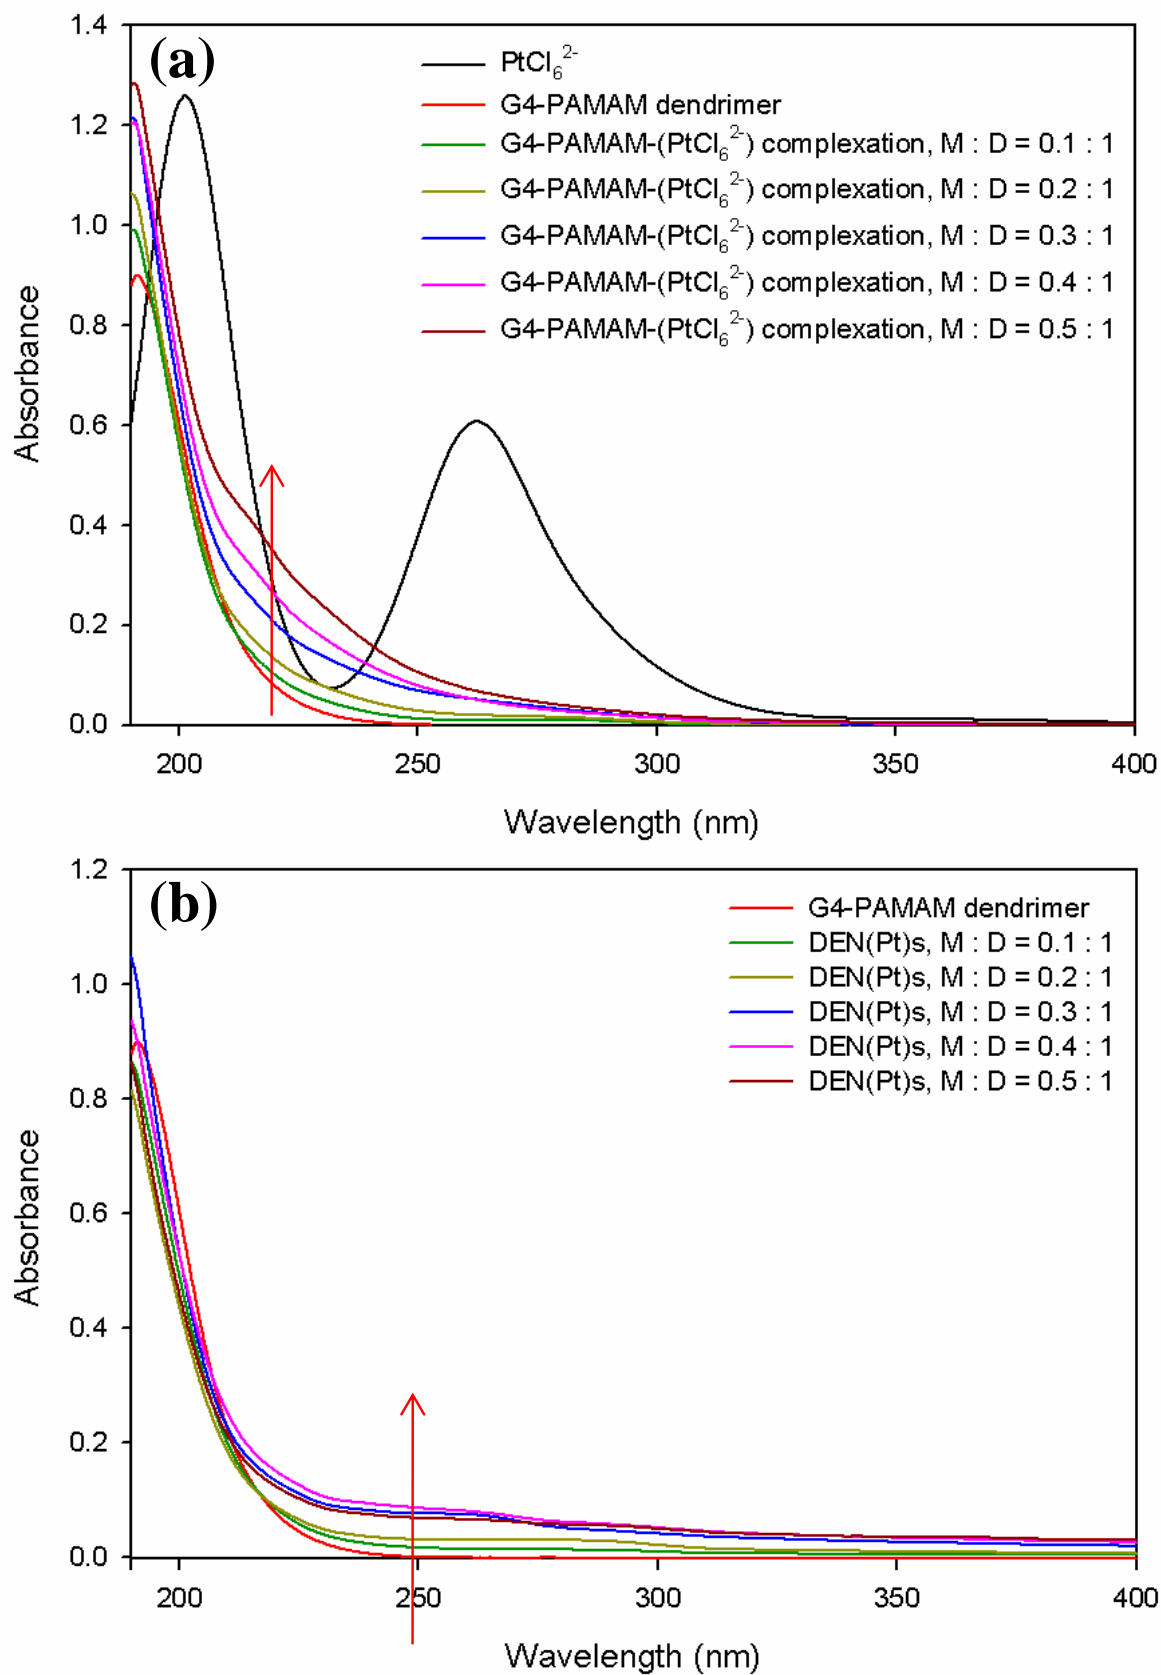

Figure SI-2. UV-VIS absorption spectra of (a) PtCl<sub>6</sub><sup>2-</sup>, G4 PAMAM dendrimer and complexes between PtCl<sub>6</sub><sup>2-</sup> and G4 PAMAM dendrimer and (b) G4 PAMAM dendrimer and DEN(PtNP)s.

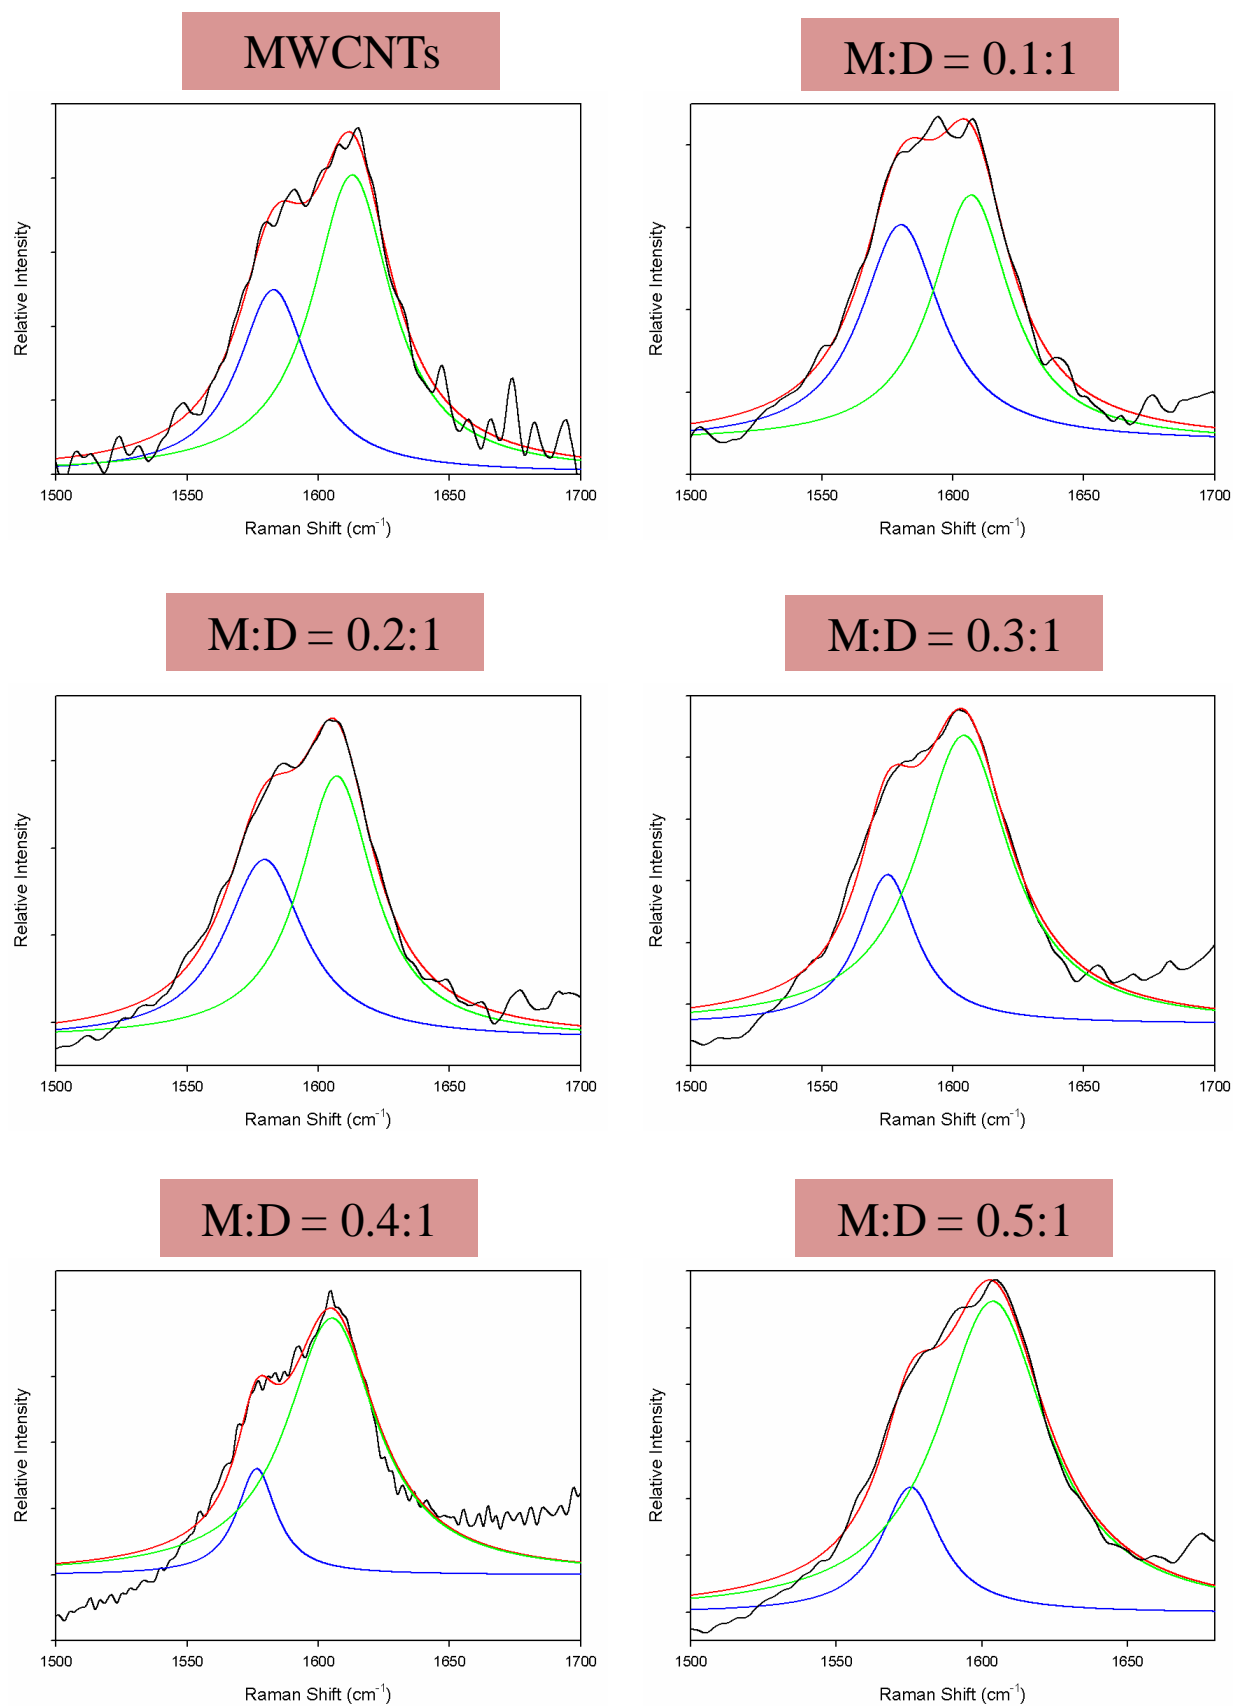

Figure SI-3. Deconvolution of G and D' bands of MWCNT and CNT/DEN(PtNP)s hybrids at different M:D ratios in Raman spectra at an excitation wavelength of 785 nm.
